1  
2  
3  
4  
5  
6  
7  
8  
9  
10  
11  
12  
13  
14  
15  
16  
17  
18  
19  
20  
21  
22  
23  
24  
25

**Rule-based habitat suitability modelling for the reintroduction of the grey wolf**  
**(*Canis lupus*) in Scotland**

Vashti Gwynn<sup>1\*</sup>, Elias Symeonakis<sup>1</sup>

<sup>1</sup>Department of Natural Sciences, Manchester Metropolitan University, Manchester, United Kingdom

\*Corresponding author

Email: [vashtigwynn@gmail.com](mailto:vashtigwynn@gmail.com) (VG)

## 26 **Abstract**

27           Though native to Scotland, the grey wolf (*Canis lupus*) was extirpated c.250 years ago as part  
28 of a global eradication drive. The global population has recently expanded, now occupying 67% of  
29 its former range. Evidence is growing that apex predators provide a range of ecological benefits,  
30 most stemming from the reduction of overgrazing by deer – something from which Scotland suffers.  
31 In this study, we build a rule-based habitat suitability model for wolves on the Scottish mainland.  
32 From existing literature, we identify the most important variables as land cover, prey density, road  
33 density and human density, and establish thresholds of suitability for each. Fuzzy membership  
34 functions are used to assign suitability values to each variable, followed by fuzzy overlay to combine  
35 all four: a novel approach to habitat suitability modelling for terrestrial mammals. Model sensitivity  
36 is tested for land cover and prey density, as these variables constitute a knowledge gap and an  
37 incomplete dataset, respectively. The Highlands and Grampian mountains emerge strongly and  
38 consistently as the most suitable areas, largely due to high negative covariance between prey density  
39 and road/human density. Sensitivity testing reveals the models are fairly robust to changes in prey  
40 density, but less robust to changes in the scoring of land cover, with the latter altering the distribution  
41 of land mainly through the 70 – 100% suitability range. However, in statistical significance tests,  
42 only the least and most generous versions of the model emerge as giving significantly different results.  
43 Depending on the version of the model, a contiguous area of between 10,139km<sup>2</sup> and 18,857km<sup>2</sup> is  
44 shown to be 80 to 100% suitable. This could be sufficient to support between 50 and 94 packs of  
45 four wolves, if the average pack range size is taken to be 200km<sup>2</sup>. We conclude that in terms of  
46 habitat availability, reintroduction should be feasible.

47

## 48 **Introduction**

49           The grey wolf (*Canis lupus*) is native to Scotland, but was extirpated by humans c.250 years  
50 ago (1,2). This persecution was part of a global eradication effort that brought wolf numbers to their  
51 lowest point between the 1930s and 1960s (3). However, due to subsequent legal protection and  
52 conservation, the wolf population has expanded once again, and now occupies 67% of its former  
53 global range, including substantial expansion in mainland Europe (4). It is, therefore, unnecessary to  
54 re-establish wolf populations in the UK in order to conserve the species, but there is growing evidence  
55 that the presence of native apex predators brings with it a range of ecological benefits (2,4,5). Ripple  
56 et al. (4) showed that large carnivores are necessary to maintain biodiversity and ecosystem function,  
57 and that their roles cannot be fully reproduced by humans, and Atkins et al. (5) state that the  
58 elimination of large carnivores can suppress plant regeneration, due to population expansion and  
59 behaviour changes in herbivores. Moreover, the grey wolf can cause mesopredator cascades  
60 (affecting both mesopredators and their prey), and tri-trophic cascades (affecting every level of the  
61 food-web down to plants) (4). Such benefits are needed in Scotland, where deer densities are beyond  
62 ecological sustainability, and where red deer can reach a density of 150/km<sup>2</sup> in some areas in winter  
63 (2,6). This has a serious impact on the structure, composition and function of Scottish ecosystems,  
64 especially on tree regeneration, through overgrazing and over-browsing (2,6). The 1995  
65 reintroduction of grey wolves into Yellowstone National Park is considered instructive as to what  
66 may happen should wolves be reintroduced to the Scottish Highlands, as they share almost identical  
67 key species (grey wolves, elk/red deer, aspen) (2). In Yellowstone, just a few wolves have had  
68 profound effects, including tri-trophic cascades that ultimately improved river hydrology, and  
69 increased abundance and diversity in many species (2).

70           Nilsen et al. (1) predict that if wolves were present in Scotland for 60 years, deer densities  
71 would decline to 7/km<sup>2</sup>, with >50% reduction in some places. This is in line with the Deer  
72 Commission for Scotland's target of 6/km<sup>2</sup>, and would greatly relieve the current financial burden of  
73 annual hind culling in pursuit of this target (1). Additionally, it is proposed that the re-establishment

74 of the “Landscape of Fear” would produce behavioural changes in deer, and thus ecosystem benefits,  
75 beyond what reduction of numbers could achieve (2,7). Other benefits could include significant wolf-  
76 related tourism and carbon sequestration due to regenerating woodland (1,4).

77         While wolf reintroduction in Britain is not currently being considered, the government’s 25  
78 Year Environment Plan sets out policy commitments to provide “opportunities for the reintroduction  
79 of native species” (8). Reintroductions and rewilding are currently popular, and the reintroduction  
80 of another keystone species – beavers – has received much attention and support. There is also  
81 growing emphasis on the ecological importance of intact ecosystems, e.g. see Plumptre et al. (9). In  
82 light of this, and the well-documented possible benefits of apex predators outlined above, the  
83 feasibility and desirability of wolf reintroduction in the UK needs to be assessed. Manning et al. (2)  
84 note the importance of a pre-existing body of research should reintroduction be considered in the  
85 future. This study is limited to Scotland because it is the area of the UK likely to be most suitable,  
86 due to its extensive deer-filled wild lands and low human density. Additionally, only the Scottish  
87 mainland was considered, as this is where any reintroduction programme would likely take place.  
88 Previous studies have explored some aspects of large predator reintroduction in Scotland, including  
89 modelling hypothetical impacts of wolves on the deer population (1,10), and mapping habitat and  
90 likely population expansion if lynx were reintroduced (11,12). Sandom et al. (10) take into account  
91 some habitat elements in their model of a hypothetical large fenced Highland reserve containing  
92 wolves. However – to our knowledge – no one has yet created a wolf habitat suitability model for all  
93 of mainland Scotland.

94         There are many existing predictive habitat suitability models for wolves in countries where  
95 they are already extant (notably in Italy, Switzerland, Poland, Germany and the northern USA) (13–  
96 22). Usually, the environmental characteristics of the areas in which wolves are already present are  
97 used to train the model (often a logistic regression model), which is then applied across the country  
98 or region to identify other areas that may be suitable. The situation in Scotland is fundamentally

99 different, as wolves are not currently extant there, and neither Italy, Switzerland, Poland, Germany  
100 nor the northern USA can be considered sufficiently similar to Scotland, as regards land cover,  
101 climate and elevation, to be able to apply their habitat selection models directly. Fuzzy logic  
102 analysis is widely used in predictive modelling, including marine and aquatic habitat suitability  
103 modelling (23–26). It recognises marginal locations that sit on the boundaries of classes by assigning  
104 *likelihood* of class membership to each location (23,27) However, with the exception of the study by  
105 Zabihi Afratakhti et al. (27) fuzzy logic analysis is notably absent from the field of terrestrial habitat  
106 suitability modelling. Thus its use in this study represents a novel approach to mammalian habitat  
107 suitability modelling.

108 Here, we assess habitat suitability for wolves in mainland Scotland employing a rules-based  
109 approach, based on existing knowledge about wolf ecology (23), and fuzzy logic analysis, which  
110 allows for dataset inaccuracies and uncertainty in both the definition of attribute classes and in the  
111 measurement of the phenomenon. We carry out a sensitivity analysis of the model for the variable  
112 whose suitability is most uncertain (land cover), and for the variable for which we have the least data  
113 (prey density). Along with the use of fuzzy logic analysis, this allows for the incorporation of  
114 uncertainty in modelling and subsequent decision-making (28). This is particularly important in  
115 habitat suitability studies, as they contain numerous possible sources of error and/or uncertainty, e.g.  
116 spatial data inaccuracies, definition of rules based on other environments, etc (28,29).

117

## 118 **Methods**

### 119 **Study Area**

120 Scotland is a north-west European nation of 78,352km<sup>2</sup>, occupying the northern third of the  
121 island of Great Britain (Fig 1) (30,31). It has a temperate oceanic climate, that is wetter in the west  
122 with milder winters. Mean temperature in the coldest month is approximately 4°C, and in the warmest  
123 month, 14°C. Annual precipitation ranges from 635mm - >1000mm east to west, and significant

124 snow falls on land above 460m in the winter (30). Glaciated in the Pleistocene, the Highlands in the  
125 north are mountainous and rugged, whereas the Central Lowlands are relatively flat, and the Southern  
126 Uplands are hilly (31). Almost all of Scotland's primary forests have been cleared, and peatlands are  
127 widespread on the moors and hills, which are largely used for sheep farming and deer and grouse  
128 estates (30,31). Only 10% of the UK's population live in Scotland, 75% of which dwell in the Central  
129 Lowlands, leaving rural areas sparsely populated (30).

130

*Fig 1: Physical map of Scotland and its location within north-west Europe inset. The mountains of the Highlands/Grampians in the North, the belt of the Central Lowlands, and the hills of the Southern Uplands can be clearly seen (Ordnance Survey, 2013; OpenStreetMap, n.d.).*

## 131 **Rationale**

132 Wolf habitat must be considered at a landscape scale, due to the size of the pack territories,  
133 which are typically 100 – 200km<sup>2</sup>, but vary greatly (13,17,32), and due to wolves' long-distance  
134 dispersal, which can be hundreds of kilometres (32). Many European studies find there is a strong  
135 correlation between wolf presence and forest cover (14,15,19,20), but it must also be recognised that  
136 in these countries, areas with *low* human influence and *high* prey density tend to have correspondingly  
137 *high* forest cover. For instance, the Swiss Valais is 22% forest, and nearly all ungulates are restricted  
138 to forest habitats, especially in winter (18). Jędrzejewski et al. (19,20) also attribute Polish wolf pack  
139 preference for forest cover to avoidance of humans. This association between high forest cover and  
140 high prey density/low human presence is not the case in Scotland, which is only 18.5% forest (mostly  
141 conifer plantations) and where heathland and upland bog constitute the majority of its unpeopled and  
142 deer-stocked wild lands (33). Meanwhile, many American models find that wolf presence and  
143 abundance is more directly related to prey density or human-caused mortality risk than land cover  
144 (13,16,21). For instance, the wolf packs in the Canadian Arctic follow the caribou herds regardless

145 of habitat (34). Similarly in north-eastern USA, prey availability and not habitat type explained 72%  
146 of spatial wolf population variation (16). Road density is also recognised as a crucial factor in habitat  
147 suitability in multiple studies (e.g. (35,36)). This difference between American and European studies  
148 suggests that either different limiting factors are at play, or that high covariance makes it hard to  
149 disentangle the importance of each variable.

150 Similarly, slightly different wolf predation behaviours emerge from different European  
151 studies, though wild ungulates always predominate (though see Ciucci et al. (14), for scavenging  
152 behaviour on garbage dumps) (32,37). Though roe and red deer form the majority of wolf diets in  
153 most European studies, some studies suggest red deer are preferred (though roe deer often still make  
154 up the majority of the diet due to higher availability) (19,38–42). Therefore, it is likely that in  
155 Scotland, both roe and red deer would be predated, though there may be a preference for red deer  
156 where they are available. Fallow and Sika deer are also found in Scotland, but little data exists for  
157 wolf predation on these species (43).

158 Despite these variations across studies, land cover, prey density, road density and human  
159 density emerge as the most important factors in wolf habitat suitability. As regards land cover, we  
160 noted which cover types are associated with wolf presence and absence, but as regards the other three  
161 variables – which are continuous rather than categorical variables – we needed to establish thresholds  
162 of suitability and unsuitability.

163 Prey densities that characterise areas of wolf presence (i.e. suitable habitat) vary across studies.  
164 Jędrzejewski et al. (20) noted a drop-off in wolf presence only when prey densities were as low as  
165 0.6 deer/km<sup>2</sup>, but other studies find density requirements of at least 4/km<sup>2</sup>, with up to 13 elk per km<sup>2</sup>  
166 recorded in the wolf ranges in Yellowstone National Park (10,21,22,37,44).

167 As regards roads, road density (km/km<sup>2</sup>) is the standard metric used in studies that assess wolf  
168 responses to roads (13,16,18–20,35,36). Recorded road densities in areas of wolf presence (i.e.  
169 suitable habitat) vary from 0.2km/km<sup>2</sup> to around 0.4 or 0.5km/km<sup>2</sup>. Though there are areas with road

170 densities of 0.7km/km<sup>2</sup> being resettled by wolves, most studies thus far find such densities to be  
171 largely unsuitable (13,16,18,35,36,45).

172 Recorded human densities in areas of wolf presence (i.e. suitable habitat) begin at 0.43/km<sup>2</sup>  
173 (21), but there is some variation in where the upper limit lies, with the same study finding an average  
174 of just 2.33 people/km<sup>2</sup> in non-pack areas, whereas other studies record human densities all the way  
175 up to 36.7/km<sup>2</sup>, especially in Europe (13,18,22,45–47).

176 Given these varying preferences and behaviours in different regions (none of which are  
177 entirely comparable to Scotland), it may seem challenging to derive suitability rules that would apply  
178 to Scotland. However, the wolf's generalist ecology helps to offset this. Wolves are not habitat  
179 specific, and nor are they necessarily wilderness species. They have colonised habitats throughout  
180 the northern hemisphere wherever they are protected from persecution, from 20° north up to the Arctic  
181 (3,13,48). Wolf core ranges have been found to include a wide range of habitats in addition to forests,  
182 including pasture, chaparral, eskers, heath tundra, and human garbage dumps (14,34,49). Recently  
183 wolves successfully recolonised a National Park in the Netherlands, an urbanised country with an  
184 average human population density of 512/km<sup>2</sup> (against Scotland's 70/km<sup>2</sup>) (50,51). Additionally,  
185 Scotland was until recently (ecologically speaking) part of the wolf's range, and it was eradicated by  
186 persecution rather than by a lack of suitable habitat. Of course it may be fallacious to assume that  
187 because Scotland offered suitable wolf habitat in the past, it continues to do so now and in the future,  
188 but this only increases the need for rigorous study to test if that is so (29). Osborne and Seddon (29)  
189 recognise that it is essential to model extensively before reintroduction of any species, and that  
190 unsuitable habitat may be the main reason for reintroduction failures in the past.

191 Once the most important factors had been identified, and suitability thresholds established for  
192 each, fuzzy membership was applied to GIS datasets of the three continuous variables across the  
193 Scottish mainland, while land cover types were allocated scores and likewise mapped. The resulting  
194 output maps were combined using fuzzy overlay (Fig 2). This process was applied to six variations



195 in input data, to explore uncertainty and to test sensitivity. The result is a set of six output maps, each  
196 containing all four variables, grading the Scottish mainland according to its suitability as wolf habitat.  
197

**Fig 2: Flowchart of process.** A summary of the analysis process, from input datasets to output maps.  
Note there are output maps for each variable individually, and then further output maps of all four  
variables combined using fuzzy overlay.

## 198 Datasets

199 Spatial datasets for the four variables for Scotland were assembled in a GIS (ArcGIS Desktop  
200 10.7.1 (52)), clipped to the Scottish mainland and converted to raster if originally in vector format  
201 (Table 1).

202  
203 **Table 1. Datasets and their sources used in the analysis of habitat suitability.**

| Variable      | Source                                                                                                                                                                                                                                               | Date of data collection/<br>dataset creation |
|---------------|------------------------------------------------------------------------------------------------------------------------------------------------------------------------------------------------------------------------------------------------------|----------------------------------------------|
| Land cover    | Corine Land Cover vector map, 2020 version<br><a href="https://land.copernicus.eu/pan-european/corine-land-cover/clc2018?tab=mapview">https://land.copernicus.eu/pan-european/corine-land-cover/clc2018?tab=mapview</a>                              | 2018                                         |
| Prey density  | Scottish Natural Heritage Deer Count Density vector map, revised<br>2018 <a href="https://gateway.snh.gov.uk/natural-spaces/dataset.jsp?dsid=DCD">https://gateway.snh.gov.uk/natural-spaces/dataset.jsp?dsid=DCD</a>                                 | 2010                                         |
| Road density  | Ordnance Survey's Open Roads vector map<br><a href="https://www.ordnancesurvey.co.uk/business-government/products/open-map-roads">https://www.ordnancesurvey.co.uk/business-government/products/open-map-roads</a>                                   | 2020                                         |
| Human density | National Records of Scotland (2011). 2011 Census: boundary data<br>vector map<br><a href="https://beta.ukdataservice.ac.uk/datacatalogue/studies/study?id=5819&amp;t">https://beta.ukdataservice.ac.uk/datacatalogue/studies/study?id=5819&amp;t</a> | 2011                                         |

[ype=Data%20catalogue](#)

204

205

## 206 **Land Cover**

207

208           The Corine Land Cover map is a European land cover inventory in 44 classes, based on  
209 Sentinel and Landsat imagery. It is classified at three levels of increasing thematic detail (e.g. the  
210 land cover type “Wetlands” is subclassified into “Coastal Wetlands” and “Inland Wetlands”, which  
211 are themselves subclassified into five further classes). The middle level of classification was used,  
212 as it had an appropriate level of thematic resolution. Each land cover type was scored for wolf  
213 suitability according to the available literature on wolf habitat preferences described in the Rationale  
214 (Table 2). A similar approach was used by Sandom et al. (10) in their modelling of a hypothetical  
215 fenced reserve in Scotland, but here an index between 0 and 1 was used, as that is comparable to the  
216 way fuzzy membership is allocated (where 0 indicates unsuitable habitat, and 1 suitable habitat).

217

### 218 **Table 2. Land cover suitability scores.**

| <b>Land cover</b>                          | <b>Score</b>                |
|--------------------------------------------|-----------------------------|
| Arable land                                | 0                           |
| Artificial, non-agricultural areas         | 0                           |
| Coastal wetlands                           | 0.4                         |
| Forest                                     | 1                           |
| Heterogeneous agricultural areas           | 0.2                         |
| Industrial, commercial and transport units | 0                           |
| Inland waters                              | 0                           |
| Inland wetlands                            | 0.2, 0.4 & 0.6 <sup>a</sup> |
| Marine waters                              | 0                           |

|                                                 |                             |
|-------------------------------------------------|-----------------------------|
| Mine, dump and construction sites               | 0                           |
| Open spaces with little or no vegetation        | 0.2, 0.4 & 0.6 <sup>a</sup> |
| Pastures                                        | 0                           |
| Permanent crops                                 | 0                           |
| Shrub and/or herbaceous vegetation associations | 0.2, 0.4 & 0.6 <sup>a</sup> |
| Urban fabric                                    | 0                           |

219 <sup>a</sup>*These land cover types were scored three times due to uncertainty about their level of suitability.*

220

221 The suitability of the land cover types “Inland wetlands”, “Open spaces with little or no  
222 vegetation”, and “Shrub and/or herbaceous vegetation associations” was particularly hard to score,  
223 because these land cover types are uncommon in areas where other wolf habitat suitability studies  
224 have been performed, and thus their suitability is unclear. Their level of suitability is also crucial as  
225 they are dominant habitats in Scotland. Therefore, the model was run once with them scored at 0.2,  
226 once at 0.4, and once at 0.6, so that the model sensitivity to this particular variable could be explored.  
227 These scores can be considered to indicate substantially unsuitable, somewhat unsuitable and  
228 somewhat suitable habitat, respectively.

229

## 230 **Prey Density**

231

232 The map of deer density had a resolution of 1km<sup>2</sup>, with count data attached to each 1km<sup>2</sup> cell.  
233 Due to the herding behaviour of red deer in the Highlands, deer density was highly aggregated, i.e.  
234 one cell could contain dozens of deer while those around it contained none, reflecting where the herd  
235 happened to be on the day of the count. As this snapshot did not accurately reflect the realised spatial  
236 density of deer over time, kernel density estimation (KDE) was applied to each herd location, with  
237 an output cell size of 50m and a search radius of 1480m (representing the average home range of a

238 red deer) (53,54). This “smooths” the density over a wider area, in recognition of the fact that the  
239 herd will move around its range, and so the entire range may be considered to offer prey (55).

240 Data from multiple studies suggest roe deer are an important component in wolf diets (see  
241 Rationale). Unfortunately, almost no roe deer are included in SNH’s Deer Count Density map, and  
242 no alternative roe deer density data was found. However, Campbell is cited as stating that roe deer  
243 density in the Highlands is 7.4/km<sup>2</sup> and in the Southern Uplands 5.5/km<sup>2</sup> (43). Therefore analysis was  
244 performed once with only the SNH dataset, and then a second time in which roe deer were additionally  
245 incorporated. They were incorporated at the densities mentioned above in every km<sup>2</sup> cell for the  
246 Highlands and Southern Uplands (in the council areas of Highland, Dumfries and Galloway, and  
247 Scottish Borders, to be precise). Higher deer density suitability thresholds were used in the second  
248 version to account for the smaller body size of roe deer. The values used were, as with the red deer,  
249 guided by existing literature on roe deer densities in wolf territories (22). Due to the paucity of roe  
250 deer density data, this should be considered only as indicative of whether roe deer presence/absence  
251 might strongly change the outcome of the model, and more research is no doubt needed.

252

## 253 **Road Density**

254

255 Road density (km/km<sup>2</sup>) was calculated from the Open Roads vector map at a resolution of  
256 0.5km<sup>2</sup>. No weighting was applied to roads of different rank, as this does not seem to be common  
257 practice in wolf/road studies, but this could be worthy of further investigation.

258

## 259 **Human Density**

260

261 Human density (people/km<sup>2</sup>) was calculated from the boundary census data vector map and  
262 converted to raster. With population data available only at census boundary scale, this is the dataset

263 with the coarsest resolution. These boundaries are small in urban areas, where the population is high,  
264 but large in rural areas.

265

## 266 **Processing**

267

268         Thresholds that represented completely suitable conditions (scored as 1) and completely  
269 unsuitable conditions (scored as 0) were established from the literature as regards deer, road and  
270 human densities (Table 3). Fuzzy membership with a linear membership type was then applied to  
271 each of these datasets accordingly, resulting in maps showing the suitability of that variable for  
272 wolves across mainland Scotland. This process was repeated for the deer density dataset with  
273 additional roe deer densities incorporated. The land cover dataset could not be processed using this  
274 method, because although the suitability scoring applied is numeric, it is categorical rather than  
275 continuous data, and therefore has no marginal cases (27).

276

277

278

279 **Table 3. Thresholds of suitability.**

| Variable                      | Suitable                         | Unsuitable                   |
|-------------------------------|----------------------------------|------------------------------|
| Prey density without roe deer | $\geq 5.5/\text{km}^2$           | $\leq 1/\text{km}^2$         |
| Prey density with roe deer    | $\geq 7/\text{km}^2$             | $\leq 3/\text{km}^2$         |
| Road density                  | $\leq 0.23\text{km}/\text{km}^2$ | $> 0.7\text{km}/\text{km}^2$ |
| Human density                 | $\leq 2/\text{km}^2$             | $\geq 37/\text{km}^2$        |

280

281         All four outputs were then assembled using fuzzy overlay with overlay type gamma of 0.9.  
282 Due to the paucity of fuzzy analysis in habitat suitability studies, there was no justification for using  
283 a different value, but this could be investigated further. Because of the two versions of deer density

284 and three versions of land cover datasets in use, this resulted in six output maps. These maps each  
285 incorporate all four variables, but with some changes in input values in the deer density and land  
286 cover variables (Table 4).

287

288 **Table 4. Versions of land cover dataset and prey density dataset used in each model.**

|                         | <b>Inland wetlands, Open spaces with little or no vegetation, and Shrub and/or herbaceous vegetation</b> |                                |                                |
|-------------------------|----------------------------------------------------------------------------------------------------------|--------------------------------|--------------------------------|
|                         | <b>Suitability score = 0.2</b>                                                                           | <b>Suitability score = 0.4</b> | <b>Suitability score = 0.6</b> |
| <b>Without roe deer</b> | Model 1<br>(Fig 3a)                                                                                      | Model 2                        | Model 3<br>(Fig 3b)            |
| <b>With roe deer</b>    | Model 4<br>(Fig 3c)                                                                                      | Model 5                        | Model 6<br>(Fig 3d)            |

289

290 The fuzzy overlay maps were reclassified into 10 equal classes of suitability using ArcMap's  
291 Reclassify tool. The distribution of pixels across the classes could then be used to calculate area and  
292 proportion of the Scottish mainland falling into each class, i.e. what proportion of land is 0-10%  
293 suitable, 10-20% suitable, and so on. Finally the Create Random Points tool and the Sample tool  
294 (resampling technique: nearest) were used to extract cell values from the same 500 randomly-  
295 generated points on each of the 6 fuzzy overlays, and a test for difference was performed in SPSS.  
296 As the data was strongly non-normal (Shapiro-Wilk:  $p < 0.001$ ), Kruskal-Wallis with all pairwise  
297 comparisons was used.

298

## 299 **Results**

300

301 Fig 3 shows the maps resulting from fuzzy membership analysis on land cover (Fig 3a, 3b,  
302 3c), prey density (Fig 3d and 3e), road density (Fig 3f) and human density (Fig 3g). Land cover and  
303 prey density have three and two variations respectively, as per Table 4.

304

**Fig 3: Fuzzy membership output maps.** *These show the suitability of the four variables: land cover (a,b,c) with three key types scored at 0.2, 0.4 and 0.6 respectively; prey density (d,e) without and with roe deer incorporated as a baseline density in two areas; road density (f) and human density (g). The Highlands and Grampians emerge consistently as the most suitable areas in all variables.*

305

306 Fig 3a, 3b and 3c make explicit the large areas of Scotland covered by the three land cover  
307 types on which there is little suitability data: Inland wetlands, Open spaces with little or no vegetation,  
308 and Shrub and/or herbaceous vegetation associations. Meanwhile, it can be seen that red deer  
309 densities are largely suitable in the Highlands and Grampians (Fig 3d and 3e). The addition of a roe  
310 deer baseline density in three council areas increases the suitability of the Highlands and Southern  
311 Uplands. Human density (Fig 3g) is suitable for wolves across a large proportion of Scotland, but  
312 suitable road densities (Fig 3f) are far more limited, again to the Highlands and Grampians.

313 Fig 4 shows four of the six fuzzy overlay habitat suitability maps, each combining the four  
314 variables as per Table 4. Fig 4a and 4b do not include a roe deer baseline density along with red deer  
315 density, and Fig 4a and 4c score the three key land cover types at 0.2, whereas Fig 4b and 4d score  
316 them at 0.6. The two fuzzy overlay maps using the three land cover types scored at 0.4 can be seen  
317 in the Supporting Information (S1 Fig). The more suitable habitat is concentrated in the Highlands  
318 and Grampian Mountains in all model outputs.

319

**Fig 4: Overall wolf habitat suitability.** *Fig 4a corresponds to Model 1, Fig 4b to Model 3, Fig 4c to Model 4 and Fig 4d to Model 6 (Table 4).*

320 The area and proportion of mainland Scotland falling into each of ten equal classes of  
 321 suitability was calculated for each model (Table 5). This underlines the fact that the majority of  
 322 Scotland is unsuitable according to these models, and that this does not vary much between models.  
 323 There is more variation at the high suitability end of the scale, with between 0.6% and 21% of the  
 324 area (or between 384km<sup>2</sup> and 14259.5km<sup>2</sup>) rated most suitable (0.9 – 1.0), depending on the model  
 325 used. Regardless of the model used, land is concentrated at either end of the scale of suitability, with  
 326 very little semi-suitable habitat.

327

328 **Table 5. Proportion of Scotland by suitability class.**

| Suitability      |                         | Model 1 | Model 2 | Model 3 | Model 4 | Model 5 | Model 6 |
|------------------|-------------------------|---------|---------|---------|---------|---------|---------|
| <b>0.0 - 0.1</b> | Area (km <sup>2</sup> ) | 51980.5 | 51981.5 | 51980.0 | 47305.5 | 47305.5 | 47306.0 |
|                  | Proportion              | 76.5    | 76.5    | 76.5    | 69.7    | 69.7    | 69.7    |
| <b>0.1 – 0.2</b> | Area (km <sup>2</sup> ) | 0.0     | 0.0     | 0.0     | 0.0     | 0.0     | 0.0     |
|                  | Proportion              | 0.0     | 0.0     | 0.0     | 0.0     | 0.0     | 0.0     |
| <b>0.2 – 0.3</b> | Area (km <sup>2</sup> ) | 1.0     | 0.5     | 0.5     | 0.0     | 0.0     | 0.0     |
|                  | Proportion              | 0.0     | 0.0     | 0.0     | 0.0     | 0.0     | 0.0     |
| <b>0.3 – 0.4</b> | Area (km <sup>2</sup> ) | 15.5    | 12.0    | 6.5     | 9.5     | 5.5     | 4.0     |
|                  | Proportion              | 0.0     | 0.0     | 0.0     | 0.0     | 0.0     | 0.0     |
| <b>0.4 – 0.5</b> | Area (km <sup>2</sup> ) | 86.5    | 46.0    | 37.0    | 58.0    | 30.0    | 20.0    |
|                  | Proportion              | 0.1     | 0.1     | 0.1     | 0.1     | 0.0     | 0.0     |
| <b>0.5 – 0.6</b> | Area (km <sup>2</sup> ) | 346.0   | 200.0   | 146.0   | 225.0   | 139.5   | 101.0   |
|                  | Proportion              | 0.5     | 0.3     | 0.2     | 0.3     | 0.2     | 0.1     |
| <b>0.6 – 0.7</b> | Area (km <sup>2</sup> ) | 1244.0  | 691.5   | 492.0   | 953.0   | 503.5   | 351.5   |
|                  | Proportion              | 1.8     | 1.0     | 0.7     | 1.4     | 0.7     | 0.5     |



|                  |                         |        |        |        |         |        |         |
|------------------|-------------------------|--------|--------|--------|---------|--------|---------|
| <b>0.7 – 0.8</b> | Area (km <sup>2</sup> ) | 4097.5 | 2114.0 | 1492.0 | 4131.5  | 1917.5 | 1270.5  |
|                  | Proportion              | 6.0    | 3.1    | 2.2    | 6.1     | 2.8    | 1.9     |
| <b>0.8 – 0.9</b> | Area (km <sup>2</sup> ) | 9755.5 | 7076.0 | 4237.0 | 14477.5 | 8820.5 | 4597.0  |
|                  | Proportion              | 14.4   | 10.4   | 6.2    | 21.3    | 13.0   | 6.8     |
| <b>0.9 – 1.0</b> | Area (km <sup>2</sup> ) | 384.0  | 5791.5 | 9519.0 | 750.0   | 9190.0 | 14259.5 |
|                  | Proportion              | 0.6    | 8.5    | 14.0   | 1.1     | 13.5   | 21.0    |

329

330 Plotting this in graph form makes it plain that the different models have little impact on the  
 331 distribution of land within the less suitable categories, but a larger impact on distribution in the more  
 332 suitable categories (Fig 5 – note the logarithmic scale on the y-axis). It also becomes evident that the  
 333 changes in land cover scoring have more of an impact on results than the addition of roe deer baseline  
 334 densities.

335

**Fig 5: Area of Scotland by suitability class.** Area of the Scottish mainland that falls into each of ten classes of suitability under different models (models 1 - 6 from left to right). Note that the Y-axis uses a logarithmic scale. All models show a similar pattern, with the distribution being highly uneven, and most areas being either completely unsuitable or substantially/completely suitable.

336 Testing for difference in a sample of 500 randomly-generated cell values taken at the same  
 337 points for all six fuzzy overlay maps shows that there is only a significant difference in results  
 338 between Model 1 and Model 6, i.e. the most and least “generous” models ( $H = -3.47$ ,  $df = 5$ ,  $p =$   
 339  $0.008$ , using the adjusted significance value).

340

341

## 342 Discussion

343

344           Our results have shown that there is a high level of covariance between three of the variables,  
345 with the most suitable areas in terms of prey density, road density and human density all concentrated  
346 in the same regions (Fig 3). This results in the Highlands and Grampian mountains emerging strongly  
347 and consistently in Fig 4 as the areas most suitable for wolves in mainland Scotland. Though this  
348 area is contiguous, it is bisected by the A82 and the many lochs of the Great Glen, which could be  
349 barriers to wolf movement. Human density, prey density and road density are suitable throughout  
350 this region, and the addition of roe deer to the prey density map makes little difference. This is partly  
351 because in the Highlands the high densities of red deer already reach the suitability threshold, whereas  
352 in the Southern Uplands, the majority of the region is excluded anyway due to high road densities. It  
353 is also partly because the adjustment of the suitability thresholds upwards to account for the smaller  
354 body size of roe deer (Table 3) somewhat negates the gains of including them.

355           However, the suitability of the fourth variable, i.e., land cover, depends heavily on how  
356 suitable open heath and bog habitat is for wolves. It is the scoring of three land cover types in this  
357 variable that make the largest difference in the fuzzy overlay maps. Though in all cases the Highlands  
358 and Grampians still emerge as most suitable, differences in scoring mean they may be anywhere  
359 between somewhat suitable and completely suitable (between 0.7 and 1.0).

360           In terms of sensitivity, it can thus be concluded that the model is not particularly sensitive to  
361 the changes in prey density used here. However, it is somewhat sensitive to changes in land cover  
362 scoring: though the regions with highest suitability do not change, their level of suitability does.

363           As regards prey density, road density, and human density, the models could be considered  
364 relatively conservative. This is due to two reasons: the estimates of suitability and unsuitability  
365 adopted as thresholds were conservative; and prey density is likely to be higher and more widespread  
366 than the SNH's deer counts suggest, as these counts mostly only include red deer spotted in open  
367 areas where and when a count is carried out. The British Deer Society's distribution survey (56) finds

368 that red deer are extant also in the Southern Uplands (which is not represented in the SNH counts),  
369 roe deer are common across Scotland, and fallow and sika deer are also found patchily in the  
370 Cairngorms, Highlands, west Scotland and the central Southern Uplands. However, it must be noted  
371 that regardless of prey density much of Scotland would remain unsuitable for wolves due to high road  
372 densities (Fig 3f).

373         Deer densities far exceed the threshold of suitability in much of the Highlands and Grampians  
374 with many areas holding  $>35/\text{km}^2$  according to SNH's deer counts (after KDE processing).  
375 Hetherington and Gorman (43) quote an average density of 12.2 deer of all species/ $\text{km}^2$  in the  
376 Highlands, while 11–12/ $\text{km}^2$  is estimated by Sandom et al. (10). This is significant because wolf pack  
377 range size is largely determined by prey availability (16,32,37). Recorded range sizes vary from  
378 33 $\text{km}^2$  to 6272 $\text{km}^2$  but average 100 – 200 $\text{km}^2$  (13,17,32,45). Fuller (37) found that at a density of  
379 6.2 white-tailed deer per  $\text{km}^2$  (roughly half the Highland deer density) pack range size was only  
380 116 $\text{km}^2$ . Meanwhile, Sandom et al.'s (10) modelling suggested that a Highland fenced reserve of  
381 600 $\text{km}^2$  would sustain 2 packs of 4 wolves for at least 100 years. At their most conservative, the  
382 models used in this study place an area of 10,139 $\text{km}^2$  between 80% and 100% suitable, and at their  
383 most generous, 18,857 $\text{km}^2$  is 80 – 100% suitable. This suggests that there may be sufficient wolf-  
384 suitable area to support between 50 and 94 packs of 4 wolves, if pack territory size is taken to be  
385 200 $\text{km}^2$ . However, it should be noted that the minimum size required for a single pack is unclear due  
386 to variations in range size recorded in the literature, and Sandom et al. (10) found that a fenced reserve  
387 of 200 $\text{km}^2$  was too small to support a Highland wolf pack for 100 years (though fencing brings with  
388 it implications that an unfenced population would not face). Additionally, a single – or even several  
389 – packs is not a self-sustaining population, as evidenced by the isolated wolf population on 544 $\text{km}^2$   
390 Isle Royale in Lake Superior, whose numbers dwindled from 50 in 1980 to 2 in 2016 before  
391 reintroductions bolstered them (57). Indeed in 1992, the US Fish and Wildlife Service stated that an  
392 area of 25,000 $\text{km}^2$  was required for a self-sustaining wolf population (16).

393           However, the evidence base of what wolves require is still developing. Linnell et al. (48),  
394 Mech (3), and Mladenoff et al. (13) all note that with protection from persecution, wolves are  
395 recolonising areas previously thought unsuitable due to high human and road densities. Future  
396 observations of recolonising wolves in Europe are likely to be instructive as to what wolves prefer  
397 and tolerate. Clarification on wolf preferences as regards open upland habitats is particularly needed  
398 for assessment of Scottish habitat suitability, as studies currently conflict on how essential forests are  
399 for wolves (see Rationale). Though this is the largest data gap as regards modelling Scottish habitat  
400 suitability, other areas of future research could also include wolf response to roads. The standard in  
401 wolf habitat studies is employing a road density measure of km/km<sup>2</sup>. However, Jędrzejewski et al.  
402 (20) found that Polish wolves avoided a 250m wide belt along roads, so the use of buffer zones in  
403 models may be more beneficial. Additionally, there seems to be little research on the implications of  
404 roads of different class, and this could be explored further. Further research into Scottish habitat  
405 suitability would also benefit from more comprehensive deer density datasets, or else modelling of  
406 deer populations across Scotland that is more sophisticated than the KDE smoothing used here.  
407 Reinecke et al. (55) point out that one of the weaknesses of KDE is that it includes invalid areas (for  
408 instance a loch), and suggest minimum convex polygons or  $\alpha$ -local convex hulls as alternative  
409 methods for modelling red deer. Dasymetric interpolation may also provide a more realistic model  
410 of deer densities (58). However, as our sensitivity testing indicated that changes in deer density did  
411 not particularly affect the model output, we did not refine our processing for this study.

412           There are many considerations regarding the return of wolves to Scotland that are beyond the  
413 scope of this study. These include the requirements of maintaining wolf genetic diversity and  
414 metapopulation, which would require either an area far bigger than that needed to support a few packs,  
415 or else regular introductions of additional animals. There are also implications arising from wolf  
416 dispersal (which can be many hundreds of kilometres) and social ecology (which is complex and  
417 could be negatively affected in a small, constrained population) (32). These implications are not

418 explored here, but would be worth further study. While this study finds deer densities are easily  
419 sufficient to support wolves in the Highlands and Grampians, it does not model the long-term  
420 predator-prey relationship or the likely impact on deer population dynamics. Lastly, one of the most  
421 important considerations in any reintroduction project is public attitude and impacts on local  
422 communities. With apex predators there is a particular risk of human-wildlife conflict, especially due  
423 to livestock predation. Wolf reintroduction also has the potential to affect the recreational value of  
424 Scotland's wild lands, and even its Protected Areas. See Sandom et al. (10) for modelling of predator-  
425 prey and population dynamics of wolves in the Highlands, and for discussion of the implications for  
426 recreation and Protected Areas. See Nilsen et al. (1) for modelling of predator-prey dynamics and  
427 ecological impacts should wolves be released in Scotland, and discussion of public attitudes and  
428 perceptions.

429         With the recolonisation of Europe by wolves, Britain increasingly becomes an outlier in its  
430 lack of apex predators. If the nation were not an island, wolves would likely soon cross our borders,  
431 if they had not already done so. As it is, short of escape from captivity, it is impossible for wolves to  
432 recolonise naturally, regardless of the suitability of our habitats or the desirability of their presence.  
433 Whether they return to Britain is a decision we must make actively, and in full consideration of the  
434 wolf's requirements and impacts. Therefore conservationists need to anticipate evidence needs now  
435 (2). As well as the need to fill knowledge gaps (some of which are identified above) both Manning  
436 et al. (2) and Sandom et al. (10) advocate reintroduction experiments in large-scale Highland  
437 enclosures, which would allow us to discover the impacts of wolves on deer and ecosystems in general,  
438 in the context of the Highlands. This study supports previous conclusions that in terms of habitat  
439 suitability, the Highlands or Grampians would be the most appropriate places for wolf reintroduction.  
440 We recommend further research into the knowledge gaps outlined, and beyond that – should Scotland  
441 still appear suitable for wolves, as we find – consideration be made of the desirability of  
442 reintroduction.

443

## 444 **Conclusion**

445

446       This study set out to identify the level of habitat suitability for wolves in the Scottish mainland.  
447 We have established thresholds of suitability and unsuitability from the literature as regards the four  
448 most important habitat variables: land cover, prey density, road density and human density. We  
449 mapped each variable according to its suitability across mainland Scotland using fuzzy membership  
450 analysis, and then combined all the variables into maps of overall suitability using fuzzy overlay. The  
451 Highlands and the Grampians emerged strongly as the most suitable areas, and sensitivity testing  
452 showed the model was fairly robust to changes in the prey density inputs, but less robust to changes  
453 in the land cover inputs, which we identify as an area in need of further research. Between 10,139km<sup>2</sup>  
454 and 18,857km<sup>2</sup> are found to be 80 – 100% suitable, depending on the model used, which may be  
455 sufficient to support between 50 and 94 packs of 4 wolves.

456

## 457 **References**

458

1. Nilsen EB, Milner-Gulland EJ, Schofield L, Mysterud A, Stenseth NC, Coulson T. Wolf reintroduction to Scotland: public attitudes and consequences for red deer management. *Proc R Soc B Biol Sci.* 2007 Apr 7;274(1612):995–1003.
2. Manning AD, Gordon IJ, Ripple WJ. Restoring landscapes of fear with wolves in the Scottish Highlands. *Biol Conserv.* 2009 Oct 1;142(10):2314–21.
3. Mech LD. The Challenge and Opportunity of Recovering Wolf Populations. *Conserv Biol.* 1995;9(2):270–8.

4. Ripple WJ, Estes JA, Beschta RL, Wilmers CC, Ritchie EG, Hebblewhite M, et al. Status and Ecological Effects of the World's Largest Carnivores. *Science*. 2014 Jan 10;343(6167):1241484.
5. Atkins JL, Long RA, Pansu J, Daskin JH, Potter AB, Stalmans ME, et al. Cascading impacts of large-carnivore extirpation in an African ecosystem. *Science*. 2019 Mar 7;eaau3561.
6. Miller GR. (PDF) The effects of mammalian herbivores on natural regeneration of upland, native woodland. [Internet]. ResearchGate. 2000 [cited 2020 Aug 17]. Available from: [https://www.researchgate.net/publication/267335294\\_The\\_effects\\_of\\_mammalian\\_herbivores\\_on\\_natural\\_regeneration\\_of\\_upland\\_native\\_woodland](https://www.researchgate.net/publication/267335294_The_effects_of_mammalian_herbivores_on_natural_regeneration_of_upland_native_woodland)
7. Laundre J, Hernández L, Altendorf K. Wolves, elk, and bison: reestablishing the 'landscape of fear' in Yellowstone National Park, USA. *Can J Zool-Rev Can Zool - CAN J ZOOL*. 2001 Aug 1;79:1401–9.
8. HM Government. A Green Future: Our 25 Year Plan to Improve the Environment [Internet]. Defra, UK Government; 2018 [cited 2022 Jan 2]. Available from: [https://assets.publishing.service.gov.uk/government/uploads/system/uploads/attachment\\_data/file/693158/25-year-environment-plan.pdf](https://assets.publishing.service.gov.uk/government/uploads/system/uploads/attachment_data/file/693158/25-year-environment-plan.pdf)
9. Plumptre AJ, Baisero D, Belote RT, Vázquez-Domínguez E, Faurby S, Jędrzejewski W, et al. Where Might We Find Ecologically Intact Communities? *Front For Glob Change* [Internet]. 2021 [cited 2021 Apr 23];4. Available from: <https://www.frontiersin.org/articles/10.3389/ffgc.2021.626635/full>
10. Sandom C, Bull J, Canney S, Macdonald DW. Exploring the Value of Wolves (*Canis lupus*) in Landscape-Scale Fenced Reserves for Ecological Restoration in the Scottish Highlands. In: Somers MJ, Hayward M, editors. *Fencing for Conservation: Restriction of Evolutionary Potential or a Riposte to Threatening Processes?* [Internet]. New York, NY: Springer New

York; 2012 [cited 2019 Apr 4]. p. 245–76. Available from: [https://doi.org/10.1007/978-1-4614-0902-1\\_14](https://doi.org/10.1007/978-1-4614-0902-1_14)

11. Hetherington DA, Miller DR, Macleod CD, Gorman ML. A potential habitat network for the Eurasian lynx *Lynx lynx* in Scotland. *Mammal Rev.* 2008;38(4):285–303.
12. Ovenden TS, Palmer SCF, Travis JMJ, Healey JR. Improving reintroduction success in large carnivores through individual-based modelling: How to reintroduce Eurasian lynx (*Lynx lynx*) to Scotland. *Biol Conserv.* 2019 Jun 1;234:140–53.
13. Mladenoff DJ, Sickley TA, Haight RG, Wydeven AP. A Regional Landscape Analysis and Prediction of Favorable Gray Wolf Habitat in the Northern Great Lakes Region. *Conserv Biol.* 1995;9(2):279–94.
14. Ciucci P, Boitani L, Francisci F, Andreoli G. Home range, activity and movements of a wolf pack in central Italy. *J Zool.* 1997;243(4):803–19.
15. Massolo A, Meriggi A. Factors affecting habitat occupancy by wolves in northern Apennines (northern Italy): a model of habitat suitability. *Ecography.* 1998;21(2):97–107.
16. Mladenoff DJ, Sickley TA. Assessing Potential Gray Wolf Restoration in the Northeastern United States: A Spatial Prediction of Favorable Habitat and Potential Population Levels. *J Wildl Manag.* 1998;62(1):1–10.
17. Corsi F, Duprè E, Boitani L. A Large-Scale Model of Wolf Distribution in Italy for Conservation Planning. *Conserv Biol.* 1999;13(1):150–9.
18. Glenz C, Massolo A, Kuonen D, Schlaepfer R. A wolf habitat suitability prediction study in Valais (Switzerland). *Landsc Urban Plan.* 2001 Jun 15;55(1):55–65.
19. Jędrzejewski W, Niedziałkowska M, Mysłajek RW, Nowak S, Jędrzejewska B. Habitat selection by wolves *Canis lupus* in the uplands and mountains of southern Poland. *Acta Theriol (Warsz).* 2005 Sep;50(3):417–28.



20. Jędrzejewski W, Jędrzejewska B, Zawadzka B, Borowik T, Nowak S, Mysłajek RW. Habitat suitability model for Polish wolves based on long-term national census. *Anim Conserv*. 2008;11(5):377–90.
21. Oakleaf JK, Murray DL, Oakleaf JR, Bangs EE, Mack CM, Smith DW, et al. Habitat Selection by Recolonizing Wolves in the Northern Rocky Mountains of the United States. *J Wildl Manag*. 2006;70(2):554–63.
22. Ronnenberg K, Habbe B, Gräber R, Strauß E, Siebert U. Coexistence of wolves and humans in a densely populated region (Lower Saxony, Germany). *Basic Appl Ecol*. 2017 Dec 1;25:1–14.
23. Adriaenssens V, Baets BD, Goethals PLM, Pauw ND. Fuzzy rule-based models for decision support in ecosystem management. *Sci Total Environ*. 2004 Feb 5;319(1):1–12.
24. Broekhoven E, Adriaenssens V, De Baets B, Verdonschot P. Fuzzy rule-based macroinvertebrate habitat suitability models for running waters. *Ecol Model*. 2006 Sep 1;198:71–84.
25. Zhang H, Sun T, Shao D, Yang W. Fuzzy Logic Method for Evaluating Habitat Suitability in an Estuary Affected by Land Reclamation. *Wetlands*. 2016 Mar 1;36(1):19–30.
26. Theodoropoulos C, Vourka A, Skoulikidis N, Rutschmann P, Stamou A. Evaluating the performance of habitat models for predicting the environmental flow requirements of benthic macroinvertebrates. *J Ecohydraulics*. 2018 Apr 1;3:30–44.
27. Zabihi Afratakhti K, Paige G, Hild A, Miller S, Wuenschel A, Holloran M. A fuzzy logic approach to analyse the suitability of nesting habitat for greater sage-grouse in western Wyoming A fuzzy logic approach to analyse the suitability of nesting habitat for greater sage-grouse in western Wyoming. *J Spat Sci*. 2017 Mar 5;62.
28. Burgman MA, Lindenmayer DB, Elith J. Managing Landscapes for Conservation Under Uncertainty. *Ecology*. 2005;86(8):2007–17.

29. Osborne PE, Seddon PJ. Selecting Suitable Habitats for Reintroductions: Variation, Change and the Role of Species Distribution Modelling. In: Ewen JG, Armstrong DP, Parker KA, editors. Reintroduction Biology: Integrating Science and Management [Internet]. Hoboken, UNITED KINGDOM: John Wiley & Sons, Incorporated; 2011 [cited 2019 Apr 4]. Available from: <http://ebookcentral.proquest.com/lib/mmu/detail.action?docID=835549>
30. Cameron EA, Brown A, Moulton MJ, Macleod IC. Scotland [Internet]. Encyclopedia Britannica. No date [cited 2021 Apr 23]. Available from: <https://www.britannica.com/place/Scotland>
31. World Atlas. Scotland Map / Geography of Scotland / Map of Scotland - Worldatlas.com [Internet]. WorldAtlas. [cited 2021 Apr 23]. Available from: <https://www.worldatlas.com/webimage/countrys/europe/scotland/ukslanlst.htm>
32. Mech LD, Boitani L. Wolves: Behavior, Ecology and Conservation [Internet]. University of Chicago Press; 2003 [cited 2019 Sep 30]. Available from: <https://www.press.uchicago.edu/ucp/books/book/chicago/W/bo3641392.html>
33. The Scottish Government. Scotland's Forestry Strategy 2019-2029 [Internet]. The Scottish Government; 2019 p. 60. Available from: <https://www.gov.scot/binaries/content/documents/govscot/publications/strategy-plan/2019/02/scotlands-forestry-strategy-20192029/documents/scotlands-forestry-strategy-2019-2029/scotlands-forestry-strategy-2019-2029/govscot%3Adocument/scotlands-forestry-strategy-2019-2029.pdf>
34. McLoughlin PD, Walton LR, Cluff HD, Paquet PC, Ramsay MA. Hierarchical Habitat Selection by Tundra Wolves. *J Mammal*. 2004 Jun 1;85(3):576–80.
35. Thiel RP. Relationship between Road Densities and Wolf Habitat Suitability in Wisconsin. *Am Midl Nat*. 1985;113(2):404–7.

36. Mech LD, Fritts SH, Radde GL, Paul WJ. Wolf Distribution and Road Density in Minnesota. *Wildl Soc Bull* 1973-2006. 1988;16(1):85–7.
37. Fuller TK. Population Dynamics of Wolves in North-Central Minnesota. *Wildl Monogr*. 1989;(105):40.
38. Olsson O, Wirtberg J, Andersson M, Wirtberg I. Wolf *Canis lupus* predation on moose *Alces alces* and roe deer *Capreolus capreolus* in south-central Scandinavia. *Wildl Biol*. 1997 Mar;3(3/4):13–25.
39. Jędrzejewski Wł, Jędrzejewska B, Okarma H, Schmidt K, Zub K, Musiani M. Prey Selection and Predation by Wolves in BiaŁowieŻa Primeval Forest, Poland. *J Mammal*. 2000;81(1):197–212.
40. Mattioli L, Capitani C, Avanzinelli E, Bertelli I, Gazzola A, Apollonio M. Predation by wolves (*Canis lupus*) on roe deer (*Capreolus capreolus*) in north-eastern Apennine, Italy. *J Zool*. 2004;264(3):249–58.
41. Jędrzejewski W, Niedziałkowska M, Hayward MW, Goszczyński J, Jędrzejewska B, Borowik T, et al. Prey choice and diet of wolves related to ungulate communities and wolf subpopulations in Poland. *J Mammal*. 2012 Dec 17;93(6):1480–92.
42. Nowak S, Mysłajek RW, Kłosińska A, Gabryś G. Diet and prey selection of wolves (*Canis lupus*) recolonising Western and Central Poland. *Mamm Biol*. 2011 Nov 1;76(6):709–15.
43. Hetherington DA, Gorman ML. Using prey densities to estimate the potential size of reintroduced populations of Eurasian lynx. *Biol Conserv*. 2007 Jun 1;137(1):37–44.
44. Varley N, Boyce MS. Adaptive management for reintroductions: Updating a wolf recovery model for Yellowstone National Park. *Ecol Model*. 2006 Mar 15;193(3):315–39.
45. Fuller T, Berg W, Radde G, Lenarz M, Joselyn G. A history and current status of wolf distribution and numbers in Minnesota. *Wildl Soc Bull*. 1992 Jan 1;20.

46. Kaartinen S, Kojola I, Colpaert A. Finnish wolves avoid roads and settlements. *Ann Zool Fenn.* 2005;42(5):523–32.
47. Chapron G, Kaczensky P, Linnell JDC, Arx M von, Huber D, Andrén H, et al. Recovery of large carnivores in Europe’s modern human-dominated landscapes. *Science.* 2014 Dec 19;346(6216):1517–9.
48. Linnell JDC, Swenson JE, Anderson R. Predators and people: conservation of large carnivores is possible at high human densities if management policy is favourable. *Anim Conserv.* 2001;4(4):345–9.
49. Kusak J, Skrbinšek AM, Huber D. Home ranges, movements, and activity of wolves (*Canis lupus*) in the Dalmatian part of Dinarids, Croatia. *Eur J Wildl Res.* 2005 Dec 1;51(4):254–62.
50. The World Bank. Population density (people per sq. km of land area) - Netherlands | Data [Internet]. 2018 [cited 2021 Apr 23]. Available from: <https://data.worldbank.org/indicator/EN.POP.DNST?locations=NL>
51. National Records of Scotland. Mid-Year Population Estimates Scotland, Mid-2019 [Internet]. National Records of Scotland; 2020. Available from: <https://www.nrscotland.gov.uk/files//statistics/population-estimates/mid-19/mid-year-pop-est-19-report.pdf>
52. ArcGIS Desktop. West Redlands, California: ESRI; 2018.
53. Mitchell B, Staines BW, Welch D. Ecology of Red Deer: A Research Review Relevant to their Management in Scotland. Institute of Terrestrial Ecology, Natural Environment Research Council; 1977.
54. Staines B, Langbein J, Burkitt T. Mammals of the British Isles: Handbook. 4th ed. Harris S, Yalden D, editors. The Mammal Society; 2008.

55. Reinecke H, Leinen L, Thißen I, Meißner M, Herzog S, Schütz S, et al. Home range size estimates of red deer in Germany: environmental, individual and methodological correlates. *Eur J Wildl Res.* 2014 Apr 1;60(2):237–47.
56. The British Deer Society. Deer Distribution Survey 2016 [Internet]. The British Deer Society; 2016. Available from: <https://www.bds.org.uk/science-research/deer-surveys/deer-distribution-survey/>
57. US National Park Service. Wolf & Moose Populations - Isle Royale National Park (U.S. National Park Service) [Internet]. 2021 [cited 2021 Apr 10]. Available from: <https://www.nps.gov/isro/learn/nature/wolf-moose-populations.htm>
58. Holt JB, Lo CP, Hodler TW. Dasymetric Estimation of Population Density and Areal Interpolation of Census Data. *Cartogr Geogr Inf Sci.* 2004 Jan 1;31(2):103–21.

459

## 460 **8. Supporting information**

461

*S1 Fig: Habitat suitability maps produced using the three land cover types scored at 0.4. These were produced by Model 2 (a) and Model 5 (b) in Table 4, respectively.*

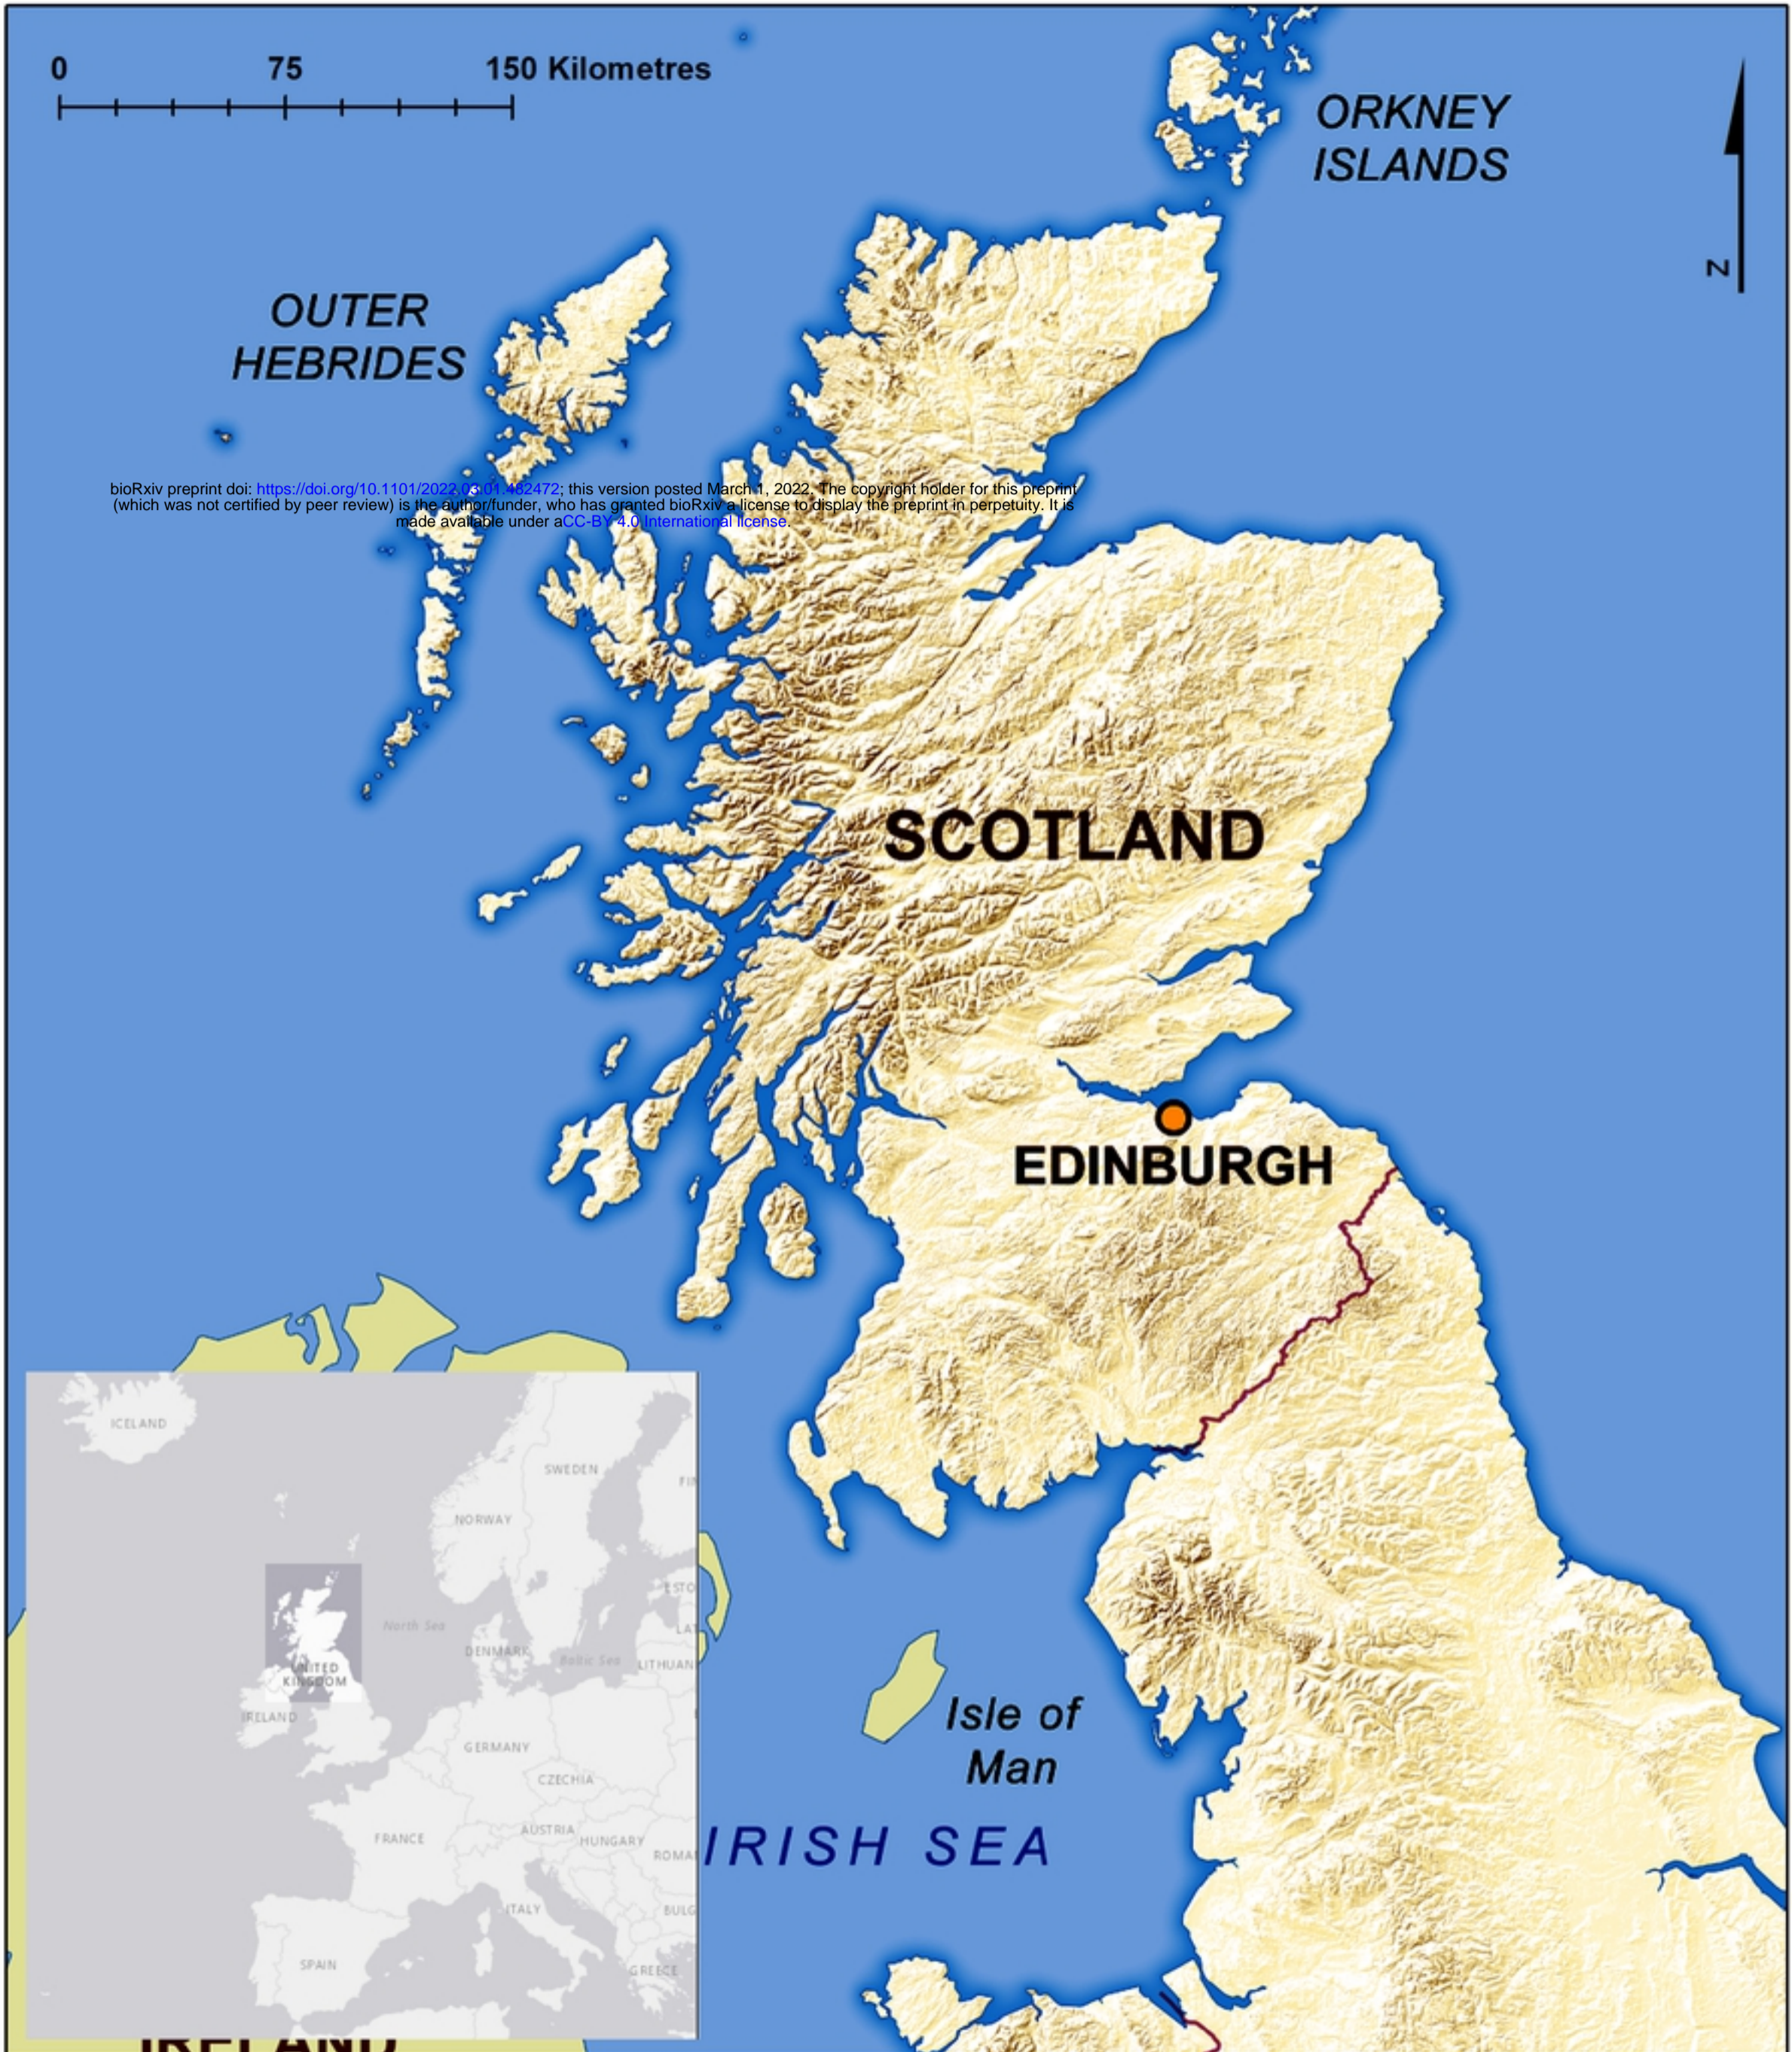

Figure 1

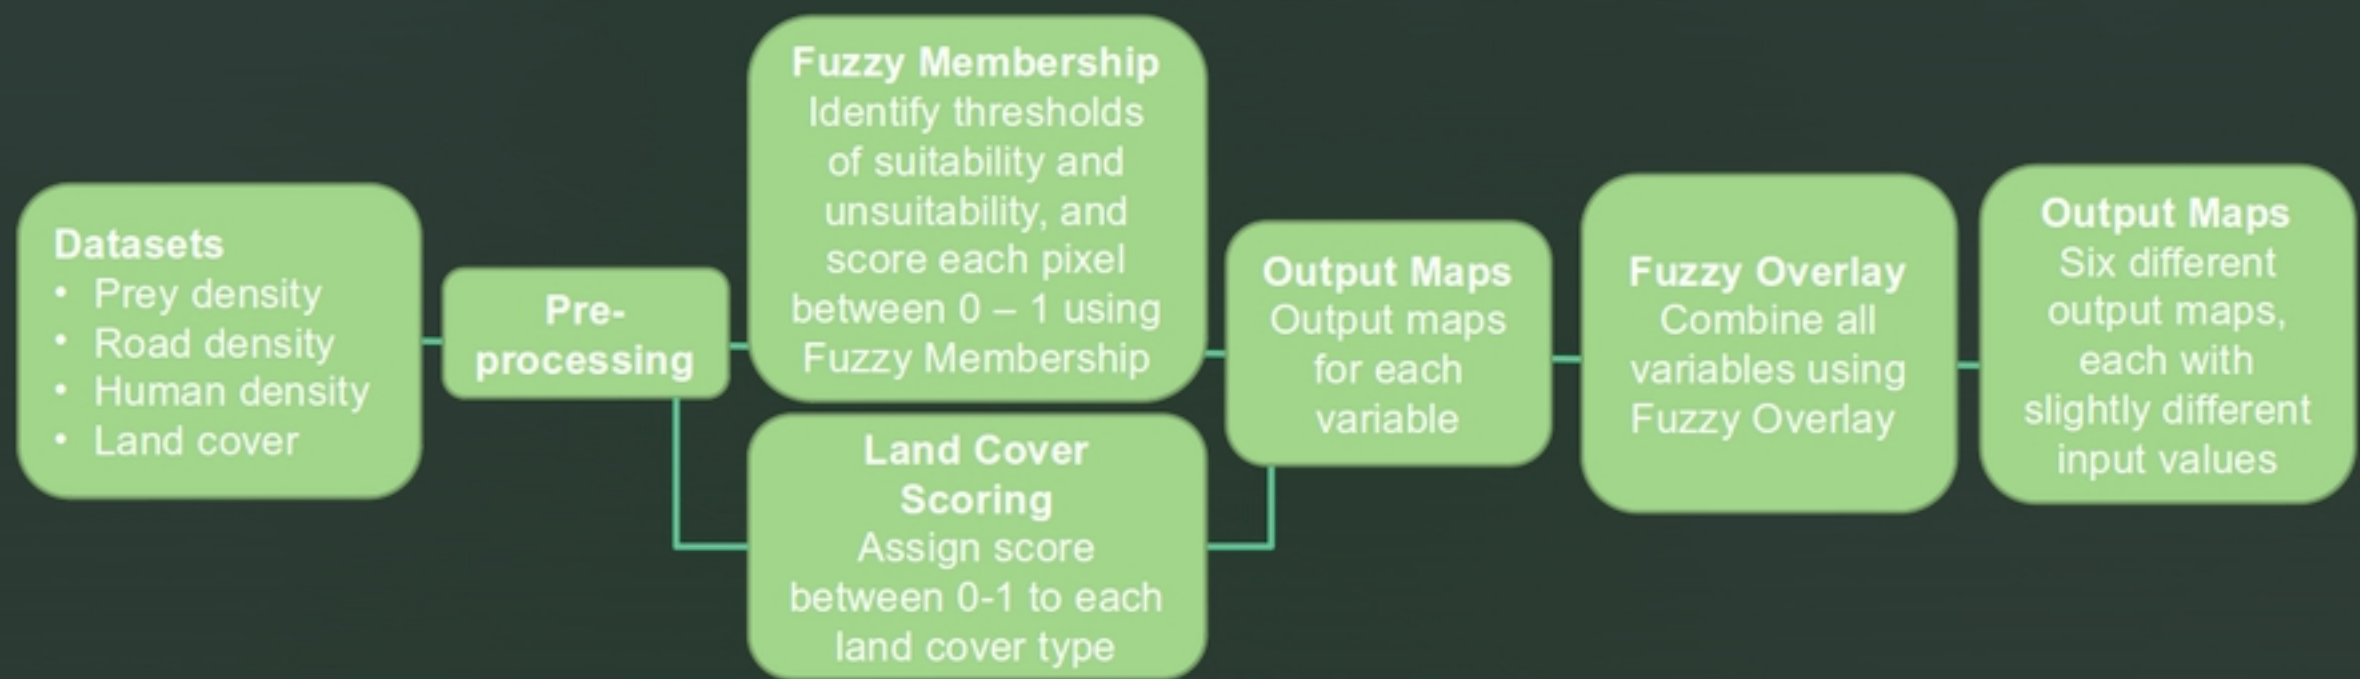

Figure 2

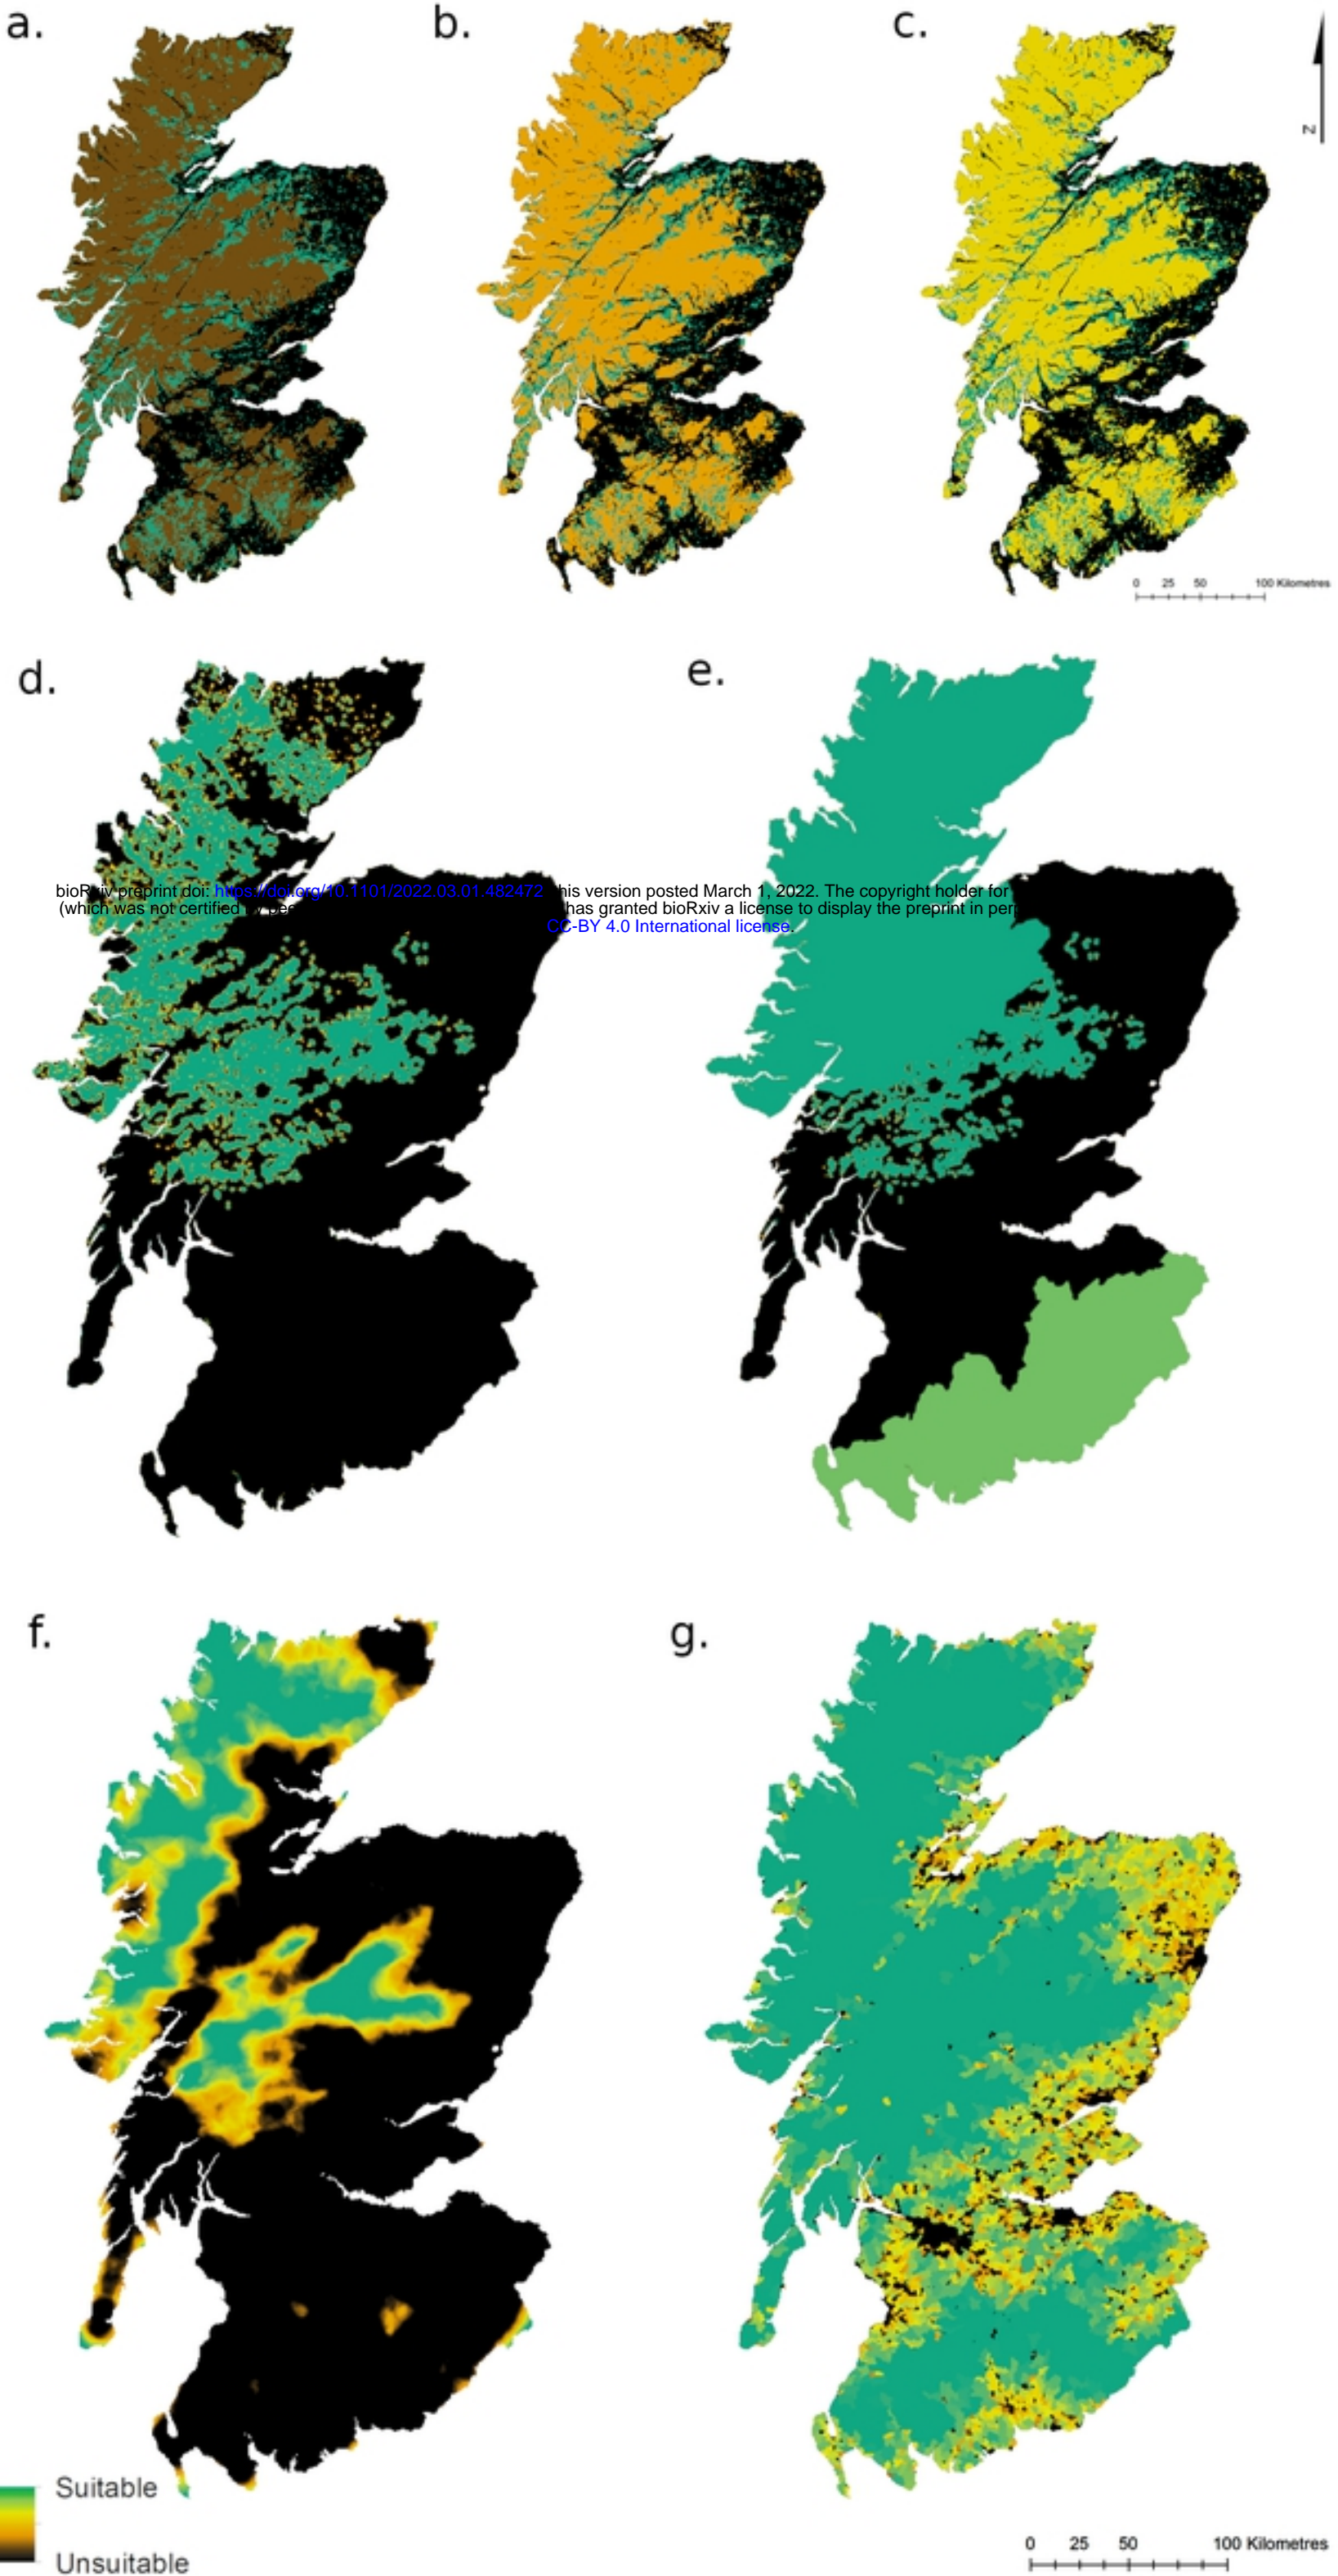

Figure 3



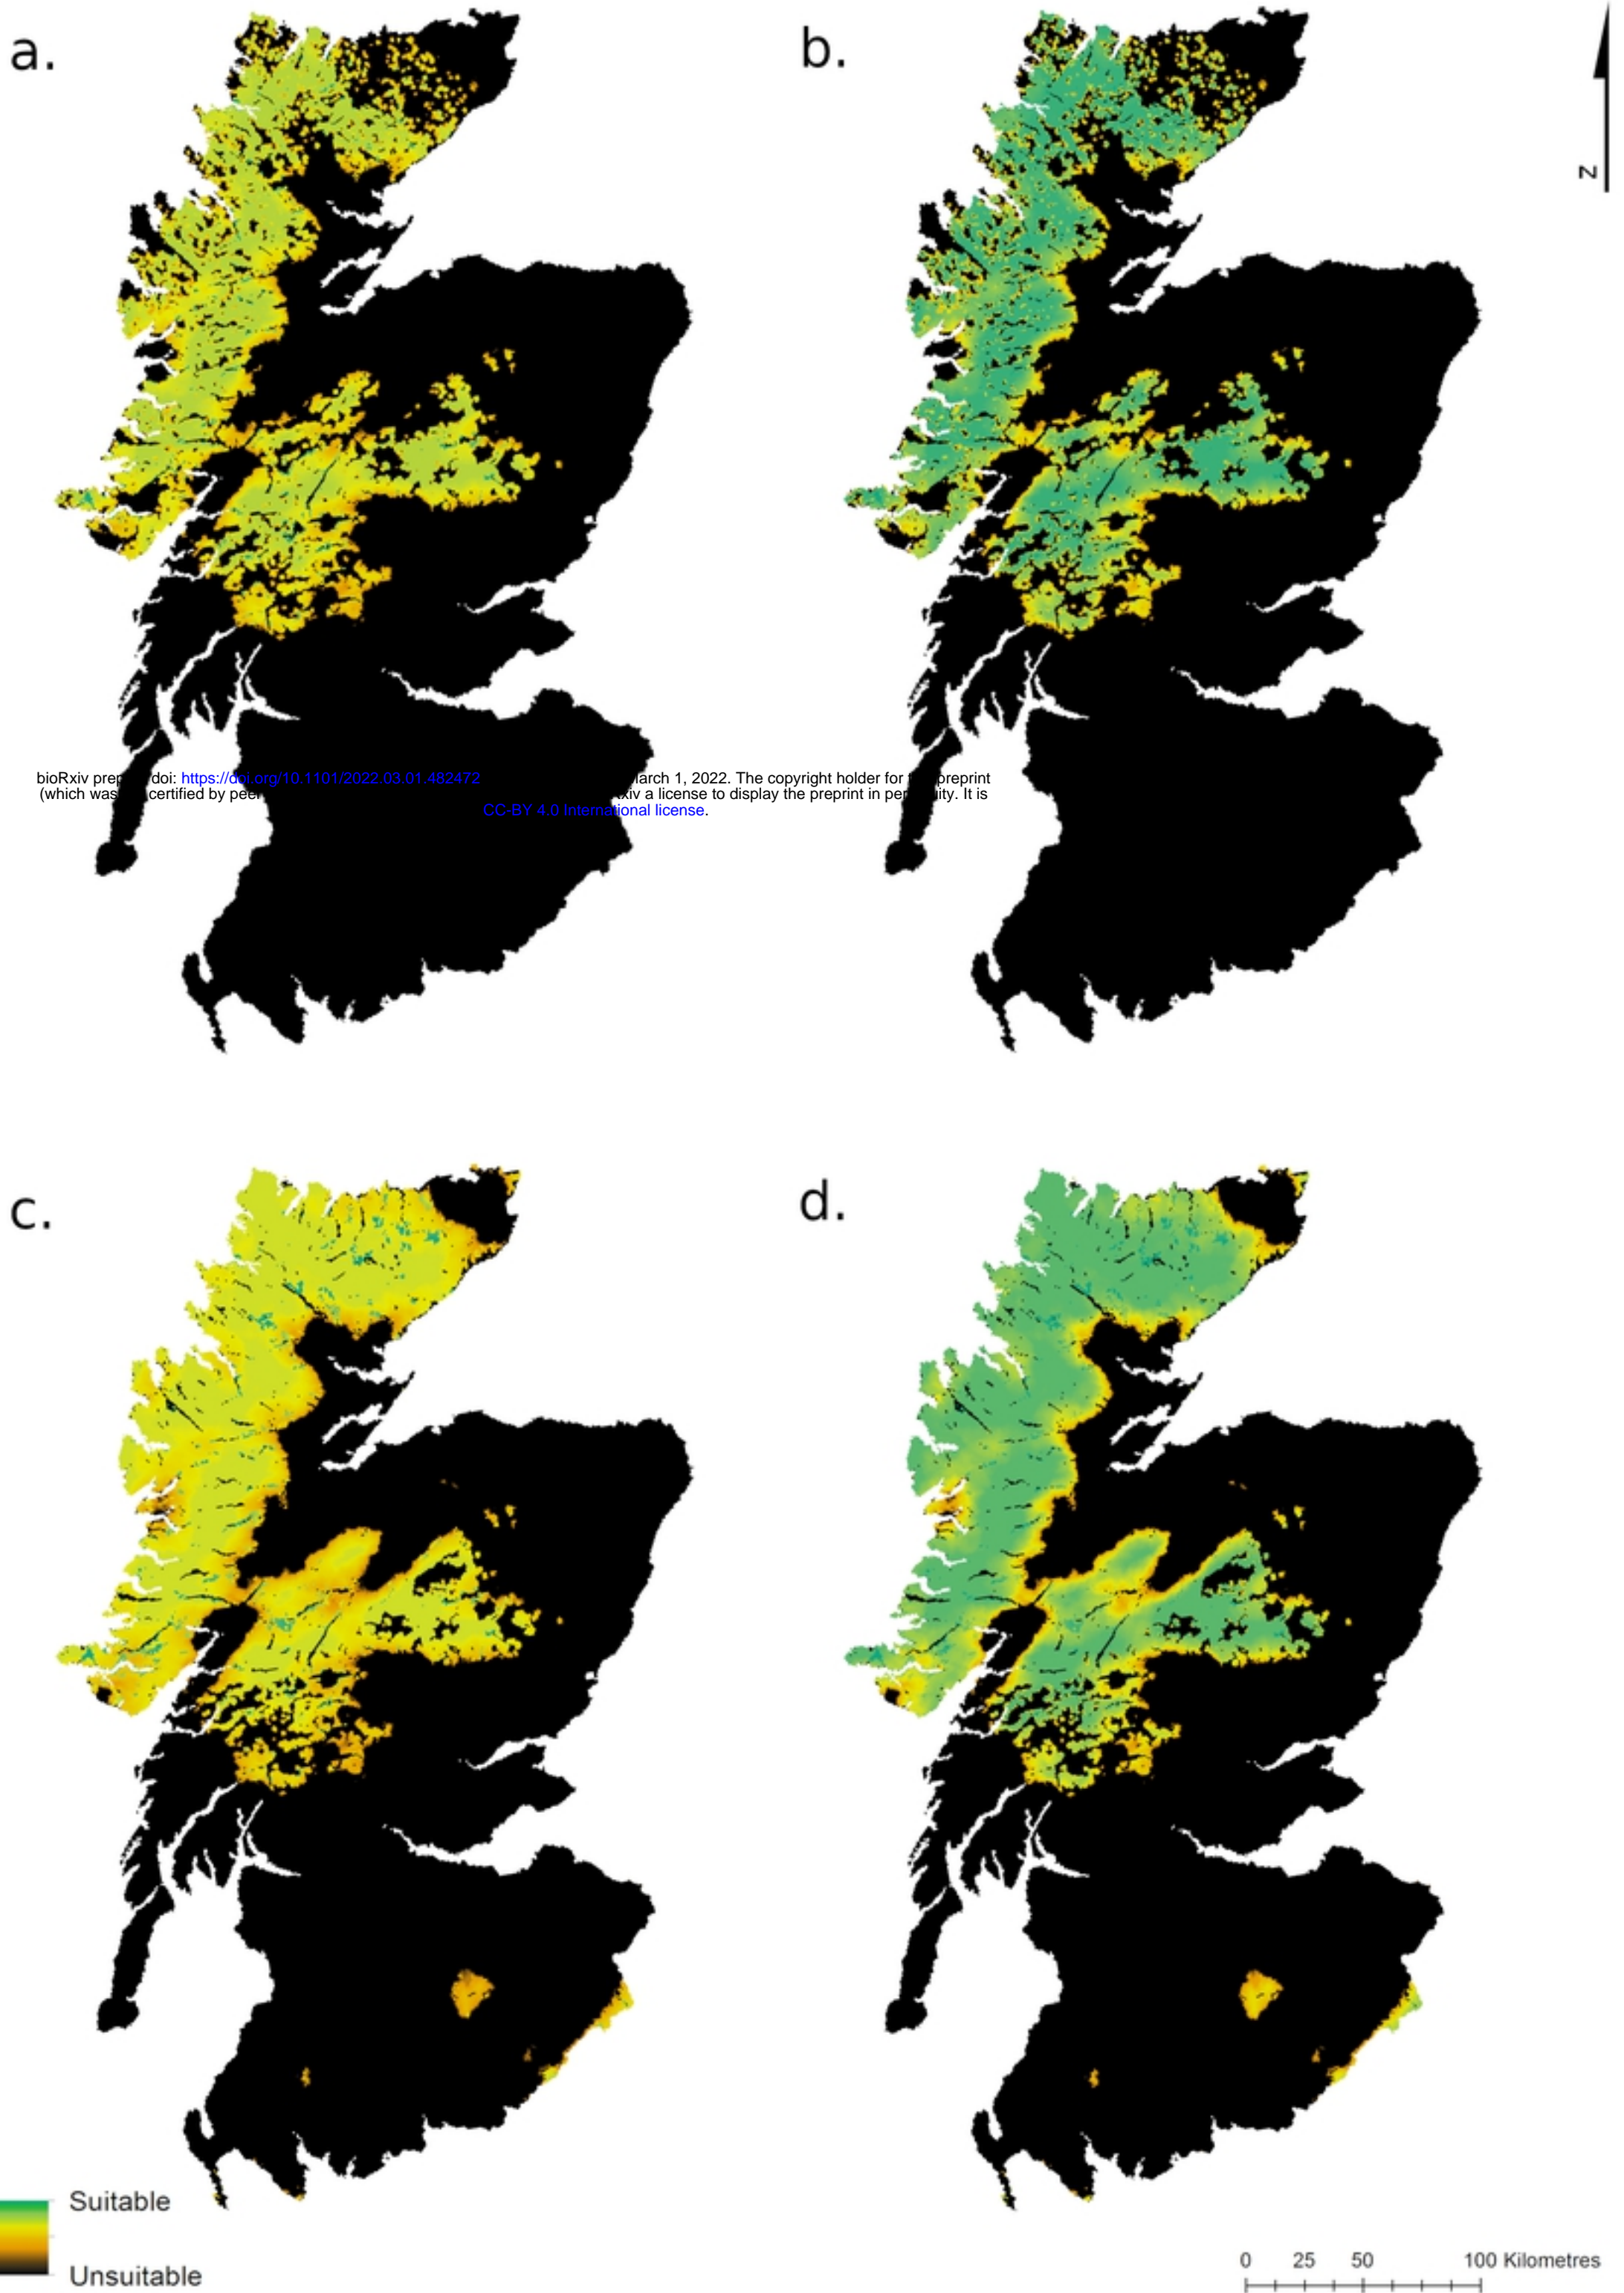

Figure 4

Area in Each Percentile of Suitability

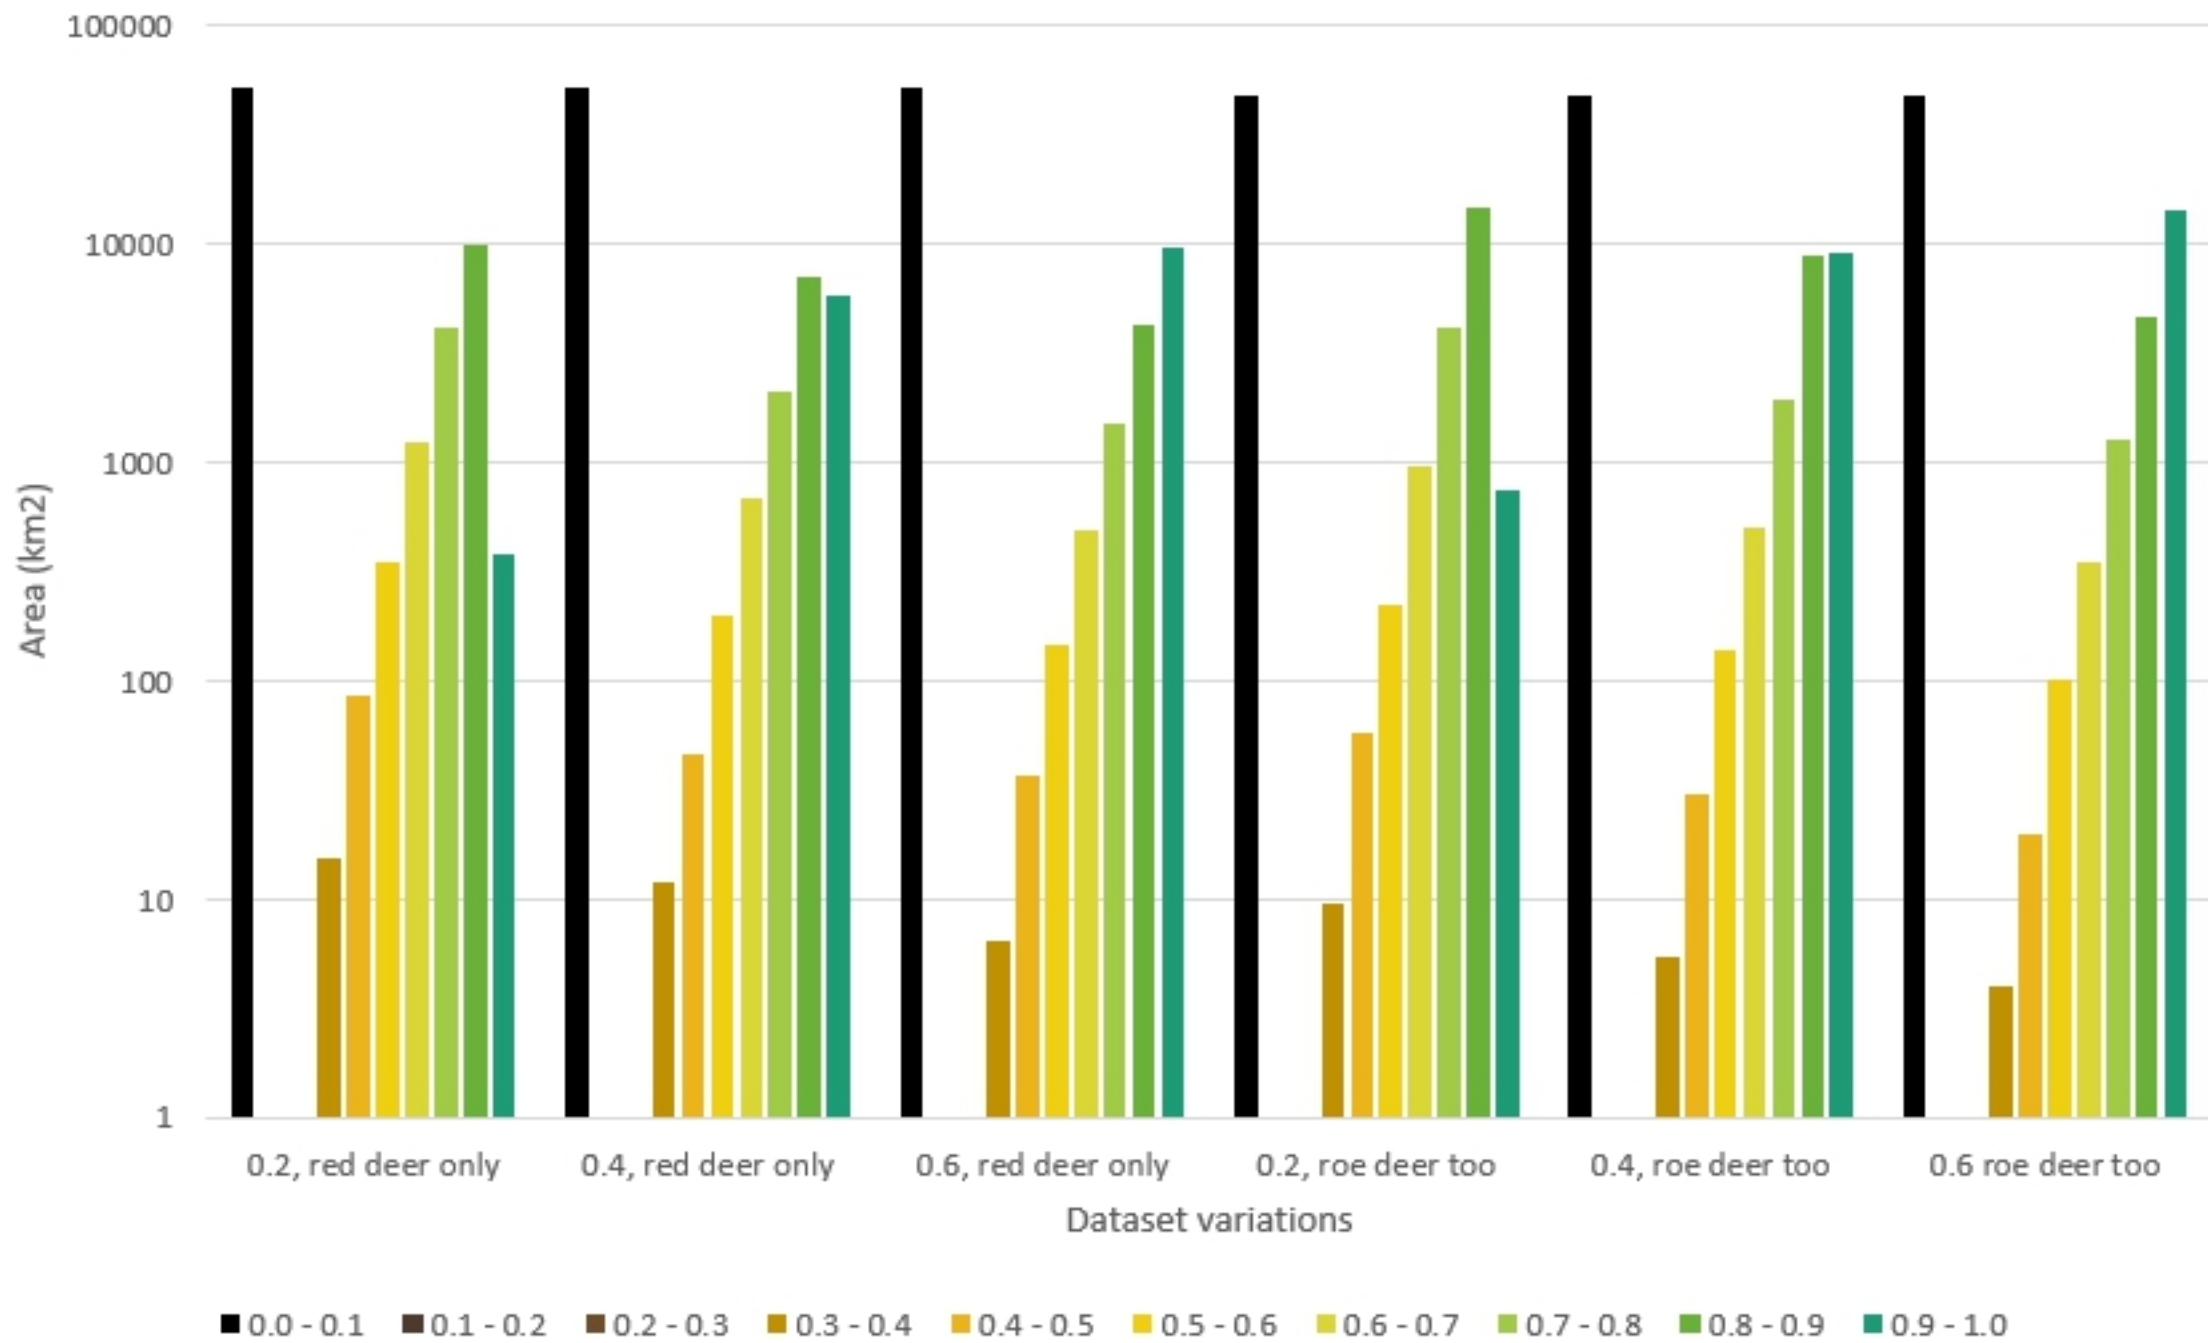

Figure 5
